# Supplementary material for: High-Resolution Mapping of Evolutionary Trajectories in a Phage
Source: PubMed Central journal article supplement — Genome Biol Evol. 2009 Aug 11;1:294–307. doi: 10.1093/gbe/evp029 (PMC2817424; doi:10.1093/gbe/evp029), 2009-08-11
Supplement: evp029_3.pdf [file evp029_3.pdf]

| Site1_id | Site2_id | Sample | Coverage | Site1_muts | Site2_muts | Both_muts | Exp_muts | Site1_perc | Site2_perc | Both_perc | chisquare | prob   | fdr    | direction |
|----------|----------|--------|----------|------------|------------|-----------|----------|------------|------------|-----------|-----------|--------|--------|-----------|
| 319      | 323      | a1     | 5600     | 33         | 63         | 1         | 0.37     | 0.59       | 1.13       | 0.02      | 0.05      | 0.8312 | 0.8908 | MORE      |
| 319      | 323      | a2     | 5223     | 16         | 47         | 1         | 0.14     | 0.31       | 0.90       | 0.02      | 0.89      | 0.3452 | 0.4981 | MORE      |
| 319      | 323      | a3     | 4022     | 17         | 42         | 0         | 0.18     | 0.42       | 1.04       | 0.00      | 0.59      | 0.4407 | 0.5846 | FEWER     |
| 319      | 323      | a4     | 6139     | 22         | 60         | 1         | 0.22     | 0.36       | 0.98       | 0.02      | 0.38      | 0.5361 | 0.6661 | MORE      |
| 319      | 323      | b1     | 8313     | 141        | 104        | 11        | 1.76     | 1.70       | 1.25       | 0.13      | 44.57     | 0.0000 | 0.0000 | MORE      |
| 319      | 323      | b3     | 8363     | 224        | 296        | 8         | 7.93     | 2.68       | 3.54       | 0.10      | 0.02      | 0.8753 | 0.9171 | MORE      |
| 319      | 323      | b4     | 6863     | 218        | 440        | 9         | 13.98    | 3.18       | 6.41       | 0.13      | 1.58      | 0.2084 | 0.3220 | FEWER     |
| 319      | 323      | c1     | 7432     | 138        | 60         | 1         | 1.11     | 1.86       | 0.81       | 0.01      | 0.14      | 0.7110 | 0.8043 | FEWER     |
| 319      | 323      | c3     | 6314     | 689        | 520        | 11        | 56.74    | 10.91      | 8.24       | 0.17      | 44.13     | 0.0000 | 0.0000 | FEWER     |
| 319      | 323      | c4     | 7045     | 848        | 724        | 9         | 87.15    | 12.04      | 10.28      | 0.13      | 87.66     | 0.0000 | 0.0000 | FEWER     |
| 319      | 324      | a1     | 5478     | 32         | 13         | 0         | 0.08     | 0.58       | 0.24       | 0.00      | 2.39      | 0.1223 | 0.2096 | FEWER     |
| 319      | 324      | a2     | 5074     | 15         | 23         | 0         | 0.07     | 0.30       | 0.45       | 0.00      | 2.77      | 0.0963 | 0.1741 | FEWER     |
| 319      | 324      | a3     | 3876     | 16         | 18         | 1         | 0.07     | 0.41       | 0.46       | 0.03      | 2.46      | 0.1167 | 0.2027 | MORE      |
| 319      | 324      | a4     | 5979     | 19         | 27         | 0         | 0.09     | 0.32       | 0.45       | 0.00      | 2.02      | 0.1557 | 0.2524 | FEWER     |
| 319      | 324      | b1     | 8143     | 128        | 40         | 0         | 0.63     | 1.57       | 0.49       | 0.00      | 0.03      | 0.8697 | 0.9171 | FEWER     |
| 319      | 324      | b3     | 8209     | 215        | 59         | 3         | 1.55     | 2.62       | 0.72       | 0.04      | 0.61      | 0.4347 | 0.5791 | MORE      |
| 319      | 324      | b4     | 6679     | 205        | 119        | 2         | 3.65     | 3.07       | 1.78       | 0.03      | 0.38      | 0.5365 | 0.6661 | FEWER     |
| 319      | 324      | c1     | 7236     | 116        | 57         | 7         | 0.91     | 1.60       | 0.79       | 0.10      | 34.98     | 0.0000 | 0.0000 | MORE      |
| 319      | 324      | c3     | 6146     | 668        | 275        | 2         | 29.89    | 10.87      | 4.47       | 0.03      | 29.48     | 0.0000 | 0.0000 | FEWER     |
| 319      | 324      | c4     | 6830     | 815        | 348        | 5         | 41.53    | 11.93      | 5.10       | 0.07      | 37.39     | 0.0000 | 0.0000 | FEWER     |
| 319      | 345      | a1     | 1714     | 6          | 12         | 1         | 0.04     | 0.35       | 0.70       | 0.06      | 5.05      | 0.0247 | 0.0534 | MORE      |
| 319      | 345      | a2     | 1659     | 1          | 14         | 0         | 0.01     | 0.06       | 0.84       | 0.00      | 28.89     | 0.0000 | 0.0000 | FEWER     |
| 319      | 345      | a3     | 1250     | 2          | 13         | 0         | 0.02     | 0.16       | 1.04       | 0.00      | 11.17     | 0.0008 | 0.0022 | FEWER     |
| 319      | 345      | a4     | 1837     | 3          | 10         | 1         | 0.02     | 0.16       | 0.54       | 0.05      | 14.43     | 0.0001 | 0.0004 | MORE      |
| 319      | 345      | b1     | 2566     | 2          | 24         | 0         | 0.02     | 0.08       | 0.94       | 0.00      | 12.51     | 0.0004 | 0.0011 | FEWER     |
| 319      | 345      | b3     | 2702     | 28         | 60         | 1         | 0.62     | 1.04       | 2.22       | 0.04      | 0.02      | 0.8753 | 0.9171 | MORE      |
| 319      | 345      | b4     | 2133     | 28         | 48         | 0         | 0.63     | 1.31       | 2.25       | 0.00      | 0.03      | 0.8675 | 0.9171 | FEWER     |
| 319      | 345      | c1     | 2332     | 8          | 15         | 0         | 0.05     | 0.34       | 0.64       | 0.00      | 3.95      | 0.0469 | 0.0937 | FEWER     |
| 319      | 345      | c3     | 1932     | 156        | 95         | 0         | 7.67     | 8.07       | 4.92       | 0.00      | 7.67      | 0.0056 | 0.0131 | FEWER     |
| 319      | 345      | c4     | 2146     | 167        | 90         | 0         | 7.00     | 7.78       | 4.19       | 0.00      | 6.84      | 0.0089 | 0.0206 | FEWER     |
| 323      | 324      | a1     | 6208     | 54         | 18         | 1         | 0.16     | 0.87       | 0.29       | 0.02      | 0.76      | 0.3827 | 0.5363 | MORE      |
| 323      | 324      | a2     | 5860     | 49         | 28         | 2         | 0.23     | 0.84       | 0.48       | 0.03      | 6.94      | 0.0085 | 0.0196 | MORE      |
| 323      | 324      | a3     | 4545     | 47         | 21         | 0         | 0.22     | 1.03       | 0.46       | 0.00      | 0.37      | 0.5409 | 0.6664 | FEWER     |
| 323      | 324      | a4     | 6816     | 66         | 34         | 2         | 0.33     | 0.97       | 0.50       | 0.03      | 4.23      | 0.0398 | 0.0819 | MORE      |
| 323      | 324      | b1     | 9244     | 65         | 50         | 3         | 0.35     | 0.70       | 0.54       | 0.03      | 13.29     | 0.0003 | 0.0007 | MORE      |
| 323      | 324      | b3     | 9345     | 277        | 82         | 3         | 2.43     | 2.96       | 0.88       | 0.03      | 0.00      | 0.9638 | 0.9736 | MORE      |
| 323      | 324      | b4     | 7727     | 475        | 136        | 1         | 8.36     | 6.15       | 1.76       | 0.01      | 6.11      | 0.0135 | 0.0302 | FEWER     |
| 323      | 324      | c1     | 8371     | 58         | 78         | 2         | 0.54     | 0.69       | 0.93       | 0.02      | 1.73      | 0.1882 | 0.2955 | MORE      |
| 323      | 324      | c3     | 7124     | 582        | 323        | 4         | 26.39    | 8.17       | 4.53       | 0.06      | 20.71     | 0.0000 | 0.0000 | FEWER     |
| 323      | 324      | c4     | 7903     | 776        | 402        | 5         | 39.47    | 9.82       | 5.09       | 0.06      | 34.16     | 0.0000 | 0.0000 | FEWER     |
| 323      | 345      | a1     | 2444     | 7          | 16         | 0         | 0.05     | 0.29       | 0.65       | 0.00      | 4.54      | 0.0330 | 0.0688 | FEWER     |
| 323      | 345      | a2     | 2445     | 8          | 17         | 0         | 0.06     | 0.33       | 0.70       | 0.00      | 3.59      | 0.0582 | 0.1121 | FEWER     |
| 323      | 345      | a3     | 1919     | 13         | 14         | 0         | 0.09     | 0.68       | 0.73       | 0.00      | 1.76      | 0.1852 | 0.2929 | FEWER     |
| 323      | 345      | a4     | 2674     | 20         | 13         | 1         | 0.10     | 0.75       | 0.49       | 0.04      | 1.69      | 0.1937 | 0.3020 | MORE      |
| 323      | 345      | b1     | 3667     | 19         | 29         | 0         | 0.15     | 0.52       | 0.79       | 0.00      | 0.82      | 0.3638 | 0.5159 | FEWER     |
| 323      | 345      | b3     | 3838     | 95         | 76         | 2         | 1.88     | 2.48       | 1.98       | 0.05      | 0.08      | 0.7762 | 0.8484 | MORE      |
| 323      | 345      | b4     | 3181     | 170        | 67         | 4         | 3.58     | 5.34       | 2.11       | 0.13      | 0.00      | 0.9647 | 0.9736 | MORE      |
| 323      | 345      | c1     | 3467     | 21         | 20         | 2         | 0.12     | 0.61       | 0.58       | 0.06      | 15.88     | 0.0001 | 0.0002 | MORE      |

|     |     |    |       |     |     |    |       |       |       |      |       |        |        |       |
|-----|-----|----|-------|-----|-----|----|-------|-------|-------|------|-------|--------|--------|-------|
| 323 | 345 | c3 | 2910  | 240 | 146 | 2  | 12.04 | 8.25  | 5.02  | 0.07 | 8.68  | 0.0032 | 0.0078 | FEWER |
| 323 | 345 | c4 | 3219  | 301 | 127 | 3  | 11.88 | 9.35  | 3.95  | 0.09 | 6.78  | 0.0092 | 0.0210 | FEWER |
| 324 | 345 | a1 | 2604  | 10  | 17  | 0  | 0.07  | 0.38  | 0.65  | 0.00 | 2.92  | 0.0872 | 0.1603 | FEWER |
| 324 | 345 | a2 | 2601  | 10  | 18  | 2  | 0.07  | 0.38  | 0.69  | 0.08 | 29.90 | 0.0000 | 0.0000 | MORE  |
| 324 | 345 | a3 | 2011  | 9   | 14  | 1  | 0.06  | 0.45  | 0.70  | 0.05 | 3.09  | 0.0789 | 0.1466 | MORE  |
| 324 | 345 | a4 | 2836  | 18  | 13  | 0  | 0.08  | 0.63  | 0.46  | 0.00 | 2.14  | 0.1439 | 0.2379 | FEWER |
| 324 | 345 | b1 | 3908  | 40  | 30  | 2  | 0.31  | 1.02  | 0.77  | 0.05 | 4.72  | 0.0298 | 0.0637 | MORE  |
| 324 | 345 | b3 | 4079  | 49  | 80  | 1  | 0.96  | 1.20  | 1.96  | 0.02 | 0.23  | 0.6328 | 0.7516 | MORE  |
| 324 | 345 | b4 | 3371  | 67  | 75  | 0  | 1.49  | 1.99  | 2.22  | 0.00 | 0.69  | 0.4072 | 0.5581 | FEWER |
| 324 | 345 | c1 | 3654  | 37  | 21  | 0  | 0.21  | 1.01  | 0.57  | 0.00 | 0.39  | 0.5299 | 0.6629 | FEWER |
| 324 | 345 | c3 | 3094  | 158 | 149 | 3  | 7.61  | 5.11  | 4.82  | 0.10 | 2.46  | 0.1170 | 0.2027 | FEWER |
| 324 | 345 | c4 | 3373  | 196 | 132 | 3  | 7.67  | 5.81  | 3.91  | 0.09 | 2.51  | 0.1135 | 0.1986 | FEWER |
| 562 | 570 | a1 | 5526  | 17  | 94  | 1  | 0.29  | 0.31  | 1.70  | 0.02 | 0.16  | 0.6921 | 0.7961 | MORE  |
| 562 | 570 | a2 | 6055  | 26  | 85  | 2  | 0.36  | 0.43  | 1.40  | 0.03 | 3.60  | 0.0579 | 0.1121 | MORE  |
| 562 | 570 | a3 | 4902  | 14  | 41  | 1  | 0.12  | 0.29  | 0.84  | 0.02 | 1.27  | 0.2605 | 0.3967 | MORE  |
| 562 | 570 | a4 | 6197  | 32  | 126 | 6  | 0.65  | 0.52  | 2.03  | 0.10 | 37.09 | 0.0000 | 0.0000 | MORE  |
| 562 | 570 | b1 | 6412  | 122 | 421 | 23 | 8.01  | 1.90  | 6.57  | 0.36 | 28.60 | 0.0000 | 0.0000 | MORE  |
| 562 | 570 | b3 | 6000  | 60  | 290 | 11 | 2.90  | 1.00  | 4.83  | 0.18 | 21.14 | 0.0000 | 0.0000 | MORE  |
| 562 | 570 | b4 | 6330  | 89  | 258 | 17 | 3.63  | 1.41  | 4.08  | 0.27 | 48.30 | 0.0000 | 0.0000 | MORE  |
| 562 | 570 | c1 | 4710  | 85  | 271 | 9  | 4.89  | 1.80  | 5.75  | 0.19 | 2.88  | 0.0898 | 0.1636 | MORE  |
| 562 | 570 | c3 | 4909  | 98  | 232 | 12 | 4.63  | 2.00  | 4.73  | 0.24 | 10.91 | 0.0010 | 0.0025 | MORE  |
| 562 | 570 | c4 | 5626  | 60  | 220 | 11 | 2.35  | 1.07  | 3.91  | 0.20 | 29.81 | 0.0000 | 0.0000 | MORE  |
| 624 | 645 | a1 | 4543  | 30  | 136 | 0  | 0.90  | 0.66  | 2.99  | 0.00 | 0.18  | 0.6687 | 0.7774 | FEWER |
| 624 | 645 | a2 | 7344  | 61  | 131 | 1  | 1.09  | 0.83  | 1.78  | 0.01 | 0.16  | 0.6891 | 0.7955 | FEWER |
| 624 | 645 | a3 | 11214 | 281 | 80  | 1  | 2.00  | 2.51  | 0.71  | 0.01 | 0.13  | 0.7172 | 0.8053 | FEWER |
| 624 | 645 | a4 | 4602  | 66  | 145 | 0  | 2.08  | 1.43  | 3.15  | 0.00 | 1.26  | 0.2623 | 0.3976 | FEWER |
| 624 | 645 | b1 | 3908  | 42  | 421 | 0  | 4.52  | 1.07  | 10.77 | 0.00 | 4.06  | 0.0440 | 0.0894 | FEWER |
| 624 | 645 | b3 | 4099  | 47  | 368 | 1  | 4.22  | 1.15  | 8.98  | 0.02 | 1.95  | 0.1628 | 0.2622 | FEWER |
| 624 | 645 | b4 | 4770  | 216 | 284 | 1  | 12.86 | 4.53  | 5.95  | 0.02 | 11.18 | 0.0008 | 0.0022 | FEWER |
| 624 | 645 | c1 | 3296  | 116 | 353 | 1  | 12.42 | 3.52  | 10.71 | 0.03 | 11.15 | 0.0008 | 0.0022 | FEWER |
| 624 | 645 | c3 | 4743  | 70  | 269 | 0  | 3.97  | 1.48  | 5.67  | 0.00 | 3.26  | 0.0708 | 0.1324 | FEWER |
| 624 | 645 | c4 | 6160  | 89  | 272 | 2  | 3.93  | 1.44  | 4.42  | 0.03 | 0.55  | 0.4574 | 0.5972 | FEWER |
| 624 | 656 | a1 | 1326  | 12  | 3   | 0  | 0.03  | 0.90  | 0.23  | 0.00 | 8.33  | 0.0039 | 0.0093 | FEWER |
| 624 | 656 | a2 | 2060  | 26  | 3   | 0  | 0.04  | 1.26  | 0.15  | 0.00 | 5.72  | 0.0168 | 0.0368 | FEWER |
| 624 | 656 | a3 | 3123  | 227 | 9   | 2  | 0.65  | 7.27  | 0.29  | 0.06 | 1.18  | 0.2768 | 0.4158 | MORE  |
| 624 | 656 | a4 | 1286  | 45  | 8   | 0  | 0.28  | 3.50  | 0.62  | 0.00 | 0.18  | 0.6710 | 0.7774 | FEWER |
| 624 | 656 | b1 | 991   | 14  | 4   | 0  | 0.06  | 1.41  | 0.40  | 0.00 | 3.54  | 0.0597 | 0.1137 | FEWER |
| 624 | 656 | b3 | 923   | 16  | 3   | 0  | 0.05  | 1.73  | 0.33  | 0.00 | 3.94  | 0.0471 | 0.0937 | FEWER |
| 624 | 656 | b4 | 1262  | 179 | 9   | 1  | 1.28  | 14.18 | 0.71  | 0.08 | 0.05  | 0.8303 | 0.8908 | FEWER |
| 624 | 656 | c1 | 813   | 89  | 16  | 0  | 1.75  | 10.95 | 1.97  | 0.00 | 1.02  | 0.3115 | 0.4595 | FEWER |
| 624 | 656 | c3 | 1321  | 38  | 1   | 0  | 0.03  | 2.88  | 0.08  | 0.00 | 7.95  | 0.0048 | 0.0113 | FEWER |
| 624 | 656 | c4 | 1722  | 41  | 4   | 0  | 0.10  | 2.38  | 0.23  | 0.00 | 1.77  | 0.1838 | 0.2922 | FEWER |
| 645 | 656 | a1 | 7533  | 53  | 35  | 2  | 0.25  | 0.70  | 0.46  | 0.03 | 6.46  | 0.0110 | 0.0251 | MORE  |
| 645 | 656 | a2 | 12221 | 107 | 75  | 2  | 0.66  | 0.88  | 0.61  | 0.02 | 1.10  | 0.2944 | 0.4363 | MORE  |
| 645 | 656 | a3 | 17680 | 145 | 87  | 2  | 0.71  | 0.82  | 0.49  | 0.01 | 0.88  | 0.3486 | 0.5009 | MORE  |
| 645 | 656 | a4 | 8029  | 74  | 32  | 3  | 0.29  | 0.92  | 0.40  | 0.04 | 16.71 | 0.0000 | 0.0001 | MORE  |
| 645 | 656 | b1 | 6982  | 85  | 41  | 0  | 0.50  | 1.22  | 0.59  | 0.00 | 0.00  | 0.9990 | 0.9990 | FEWER |
| 645 | 656 | b3 | 7922  | 102 | 60  | 2  | 0.77  | 1.29  | 0.76  | 0.03 | 0.70  | 0.4030 | 0.5548 | MORE  |
| 645 | 656 | b4 | 8165  | 114 | 57  | 2  | 0.80  | 1.40  | 0.70  | 0.02 | 0.64  | 0.4250 | 0.5755 | MORE  |

|      |      |    |       |      |     |     |       |       |      |      |        |        |        |       |
|------|------|----|-------|------|-----|-----|-------|-------|------|------|--------|--------|--------|-------|
| 645  | 656  | c1 | 5727  | 81   | 35  | 1   | 0.50  | 1.41  | 0.61 | 0.02 | 0.00   | 0.9943 | 0.9973 | MORE  |
| 645  | 656  | c3 | 8155  | 111  | 53  | 4   | 0.72  | 1.36  | 0.65 | 0.05 | 10.92  | 0.0010 | 0.0025 | MORE  |
| 645  | 656  | c4 | 10465 | 125  | 65  | 1   | 0.78  | 1.19  | 0.62 | 0.01 | 0.10   | 0.7516 | 0.8310 | MORE  |
| 1488 | 1491 | a1 | 5544  | 53   | 77  | 5   | 0.74  | 0.96  | 1.39 | 0.09 | 19.70  | 0.0000 | 0.0000 | MORE  |
| 1488 | 1491 | a2 | 5030  | 44   | 95  | 8   | 0.83  | 0.87  | 1.89 | 0.16 | 55.03  | 0.0000 | 0.0000 | MORE  |
| 1488 | 1491 | a3 | 3013  | 38   | 48  | 7   | 0.61  | 1.26  | 1.59 | 0.23 | 59.07  | 0.0000 | 0.0000 | MORE  |
| 1488 | 1491 | a4 | 6275  | 59   | 117 | 8   | 1.10  | 0.94  | 1.86 | 0.13 | 38.30  | 0.0000 | 0.0000 | MORE  |
| 1488 | 1491 | b1 | 7883  | 284  | 336 | 94  | 12.11 | 3.60  | 4.26 | 1.19 | 593.04 | 0.0000 | 0.0000 | MORE  |
| 1488 | 1491 | b3 | 6618  | 233  | 357 | 100 | 12.57 | 3.52  | 5.39 | 1.51 | 658.72 | 0.0000 | 0.0000 | MORE  |
| 1488 | 1491 | b4 | 5982  | 208  | 237 | 60  | 8.24  | 3.48  | 3.96 | 1.00 | 343.96 | 0.0000 | 0.0000 | MORE  |
| 1488 | 1491 | c1 | 6771  | 201  | 281 | 55  | 8.34  | 2.97  | 4.15 | 0.81 | 274.63 | 0.0000 | 0.0000 | MORE  |
| 1488 | 1491 | c3 | 5898  | 190  | 256 | 59  | 8.25  | 3.22  | 4.34 | 1.00 | 330.77 | 0.0000 | 0.0000 | MORE  |
| 1488 | 1491 | c4 | 6494  | 211  | 168 | 46  | 5.46  | 3.25  | 2.59 | 0.71 | 311.65 | 0.0000 | 0.0000 | MORE  |
| 1639 | 1641 | a1 | 9742  | 24   | 69  | 1   | 0.17  | 0.25  | 0.71 | 0.01 | 0.65   | 0.4212 | 0.5727 | MORE  |
| 1639 | 1641 | a2 | 12379 | 39   | 62  | 0   | 0.20  | 0.32  | 0.50 | 0.00 | 0.48   | 0.4888 | 0.6268 | FEWER |
| 1639 | 1641 | a3 | 12747 | 45   | 53  | 0   | 0.19  | 0.35  | 0.42 | 0.00 | 0.53   | 0.4677 | 0.6082 | FEWER |
| 1639 | 1641 | a4 | 10806 | 37   | 51  | 1   | 0.17  | 0.34  | 0.47 | 0.01 | 0.61   | 0.4343 | 0.5791 | MORE  |
| 1639 | 1641 | b1 | 10235 | 26   | 68  | 1   | 0.17  | 0.25  | 0.66 | 0.01 | 0.63   | 0.4289 | 0.5783 | MORE  |
| 1639 | 1641 | b3 | 11373 | 959  | 165 | 2   | 13.91 | 8.43  | 1.45 | 0.02 | 10.38  | 0.0013 | 0.0032 | FEWER |
| 1639 | 1641 | b4 | 10742 | 2194 | 258 | 2   | 52.70 | 20.42 | 2.40 | 0.02 | 61.56  | 0.0000 | 0.0000 | FEWER |
| 1639 | 1641 | c1 | 9457  | 44   | 39  | 2   | 0.18  | 0.47  | 0.41 | 0.02 | 9.67   | 0.0019 | 0.0046 | MORE  |
| 1639 | 1641 | c3 | 10848 | 165  | 60  | 0   | 0.91  | 1.52  | 0.55 | 0.00 | 0.19   | 0.6625 | 0.7744 | FEWER |
| 1639 | 1641 | c4 | 13077 | 652  | 172 | 2   | 8.58  | 4.99  | 1.32 | 0.02 | 4.59   | 0.0321 | 0.0674 | FEWER |
| 1960 | 1964 | a1 | 5577  | 155  | 160 | 45  | 4.45  | 2.78  | 2.87 | 0.81 | 382.04 | 0.0000 | 0.0000 | MORE  |
| 1960 | 1964 | a2 | 6094  | 141  | 139 | 36  | 3.22  | 2.31  | 2.28 | 0.59 | 339.49 | 0.0000 | 0.0000 | MORE  |
| 1960 | 1964 | a3 | 5159  | 60   | 52  | 10  | 0.60  | 1.16  | 1.01 | 0.19 | 133.72 | 0.0000 | 0.0000 | MORE  |
| 1960 | 1964 | a4 | 6281  | 146  | 115 | 28  | 2.67  | 2.32  | 1.83 | 0.45 | 240.47 | 0.0000 | 0.0000 | MORE  |
| 1960 | 1964 | b1 | 7370  | 367  | 413 | 123 | 20.57 | 4.98  | 5.60 | 1.67 | 563.27 | 0.0000 | 0.0000 | MORE  |
| 1960 | 1964 | b3 | 6654  | 346  | 400 | 144 | 20.80 | 5.20  | 6.01 | 2.16 | 812.37 | 0.0000 | 0.0000 | MORE  |
| 1960 | 1964 | b4 | 6437  | 307  | 291 | 110 | 13.88 | 4.77  | 4.52 | 1.71 | 724.56 | 0.0000 | 0.0000 | MORE  |
| 1960 | 1964 | c1 | 5789  | 300  | 232 | 87  | 12.02 | 5.18  | 4.01 | 1.50 | 506.89 | 0.0000 | 0.0000 | MORE  |
| 1960 | 1964 | c3 | 5464  | 231  | 168 | 50  | 7.10  | 4.23  | 3.07 | 0.92 | 272.64 | 0.0000 | 0.0000 | MORE  |
| 1960 | 1964 | c4 | 7044  | 256  | 217 | 68  | 7.89  | 3.63  | 3.08 | 0.97 | 482.48 | 0.0000 | 0.0000 | MORE  |
| 1960 | 1972 | a1 | 3978  | 32   | 113 | 8   | 0.91  | 0.80  | 2.84 | 0.20 | 49.59  | 0.0000 | 0.0000 | MORE  |
| 1960 | 1972 | a2 | 4337  | 33   | 87  | 4   | 0.66  | 0.76  | 2.01 | 0.09 | 12.51  | 0.0004 | 0.0011 | MORE  |
| 1960 | 1972 | a3 | 3525  | 17   | 57  | 3   | 0.27  | 0.48  | 1.62 | 0.09 | 18.40  | 0.0000 | 0.0001 | MORE  |
| 1960 | 1972 | a4 | 4645  | 27   | 139 | 7   | 0.81  | 0.58  | 2.99 | 0.15 | 41.58  | 0.0000 | 0.0000 | MORE  |
| 1960 | 1972 | b1 | 5540  | 92   | 354 | 29  | 5.88  | 1.66  | 6.39 | 0.52 | 94.56  | 0.0000 | 0.0000 | MORE  |
| 1960 | 1972 | b3 | 4695  | 55   | 285 | 18  | 3.34  | 1.17  | 6.07 | 0.38 | 64.71  | 0.0000 | 0.0000 | MORE  |
| 1960 | 1972 | b4 | 4669  | 56   | 202 | 13  | 2.42  | 1.20  | 4.33 | 0.28 | 44.34  | 0.0000 | 0.0000 | MORE  |
| 1960 | 1972 | c1 | 4223  | 57   | 249 | 12  | 3.36  | 1.35  | 5.90 | 0.28 | 21.23  | 0.0000 | 0.0000 | MORE  |
| 1960 | 1972 | c3 | 3910  | 54   | 158 | 12  | 2.18  | 1.38  | 4.04 | 0.31 | 42.05  | 0.0000 | 0.0000 | MORE  |
| 1960 | 1972 | c4 | 4927  | 39   | 238 | 10  | 1.88  | 0.79  | 4.83 | 0.20 | 32.61  | 0.0000 | 0.0000 | MORE  |
| 1964 | 1972 | a1 | 4473  | 48   | 115 | 16  | 1.23  | 1.07  | 2.57 | 0.36 | 171.10 | 0.0000 | 0.0000 | MORE  |
| 1964 | 1972 | a2 | 4823  | 51   | 91  | 14  | 0.96  | 1.06  | 1.89 | 0.29 | 168.28 | 0.0000 | 0.0000 | MORE  |
| 1964 | 1972 | a3 | 3859  | 23   | 58  | 8   | 0.35  | 0.60  | 1.50 | 0.21 | 151.23 | 0.0000 | 0.0000 | MORE  |
| 1964 | 1972 | a4 | 5173  | 43   | 141 | 16  | 1.17  | 0.83  | 2.73 | 0.31 | 181.57 | 0.0000 | 0.0000 | MORE  |
| 1964 | 1972 | b1 | 6295  | 176  | 359 | 67  | 10.04 | 2.80  | 5.70 | 1.06 | 346.52 | 0.0000 | 0.0000 | MORE  |
| 1964 | 1972 | b3 | 5482  | 134  | 289 | 52  | 7.06  | 2.44  | 5.27 | 0.95 | 302.46 | 0.0000 | 0.0000 | MORE  |

|      |      |    |       |     |     |    |       |      |      |      |        |        |        |       |
|------|------|----|-------|-----|-----|----|-------|------|------|------|--------|--------|--------|-------|
| 1964 | 1972 | b4 | 5368  | 96  | 205 | 34 | 3.67  | 1.79 | 3.82 | 0.63 | 257.01 | 0.0000 | 0.0000 | MORE  |
| 1964 | 1972 | c1 | 4904  | 68  | 253 | 24 | 3.51  | 1.39 | 5.16 | 0.49 | 121.81 | 0.0000 | 0.0000 | MORE  |
| 1964 | 1972 | c3 | 4508  | 78  | 161 | 16 | 2.79  | 1.73 | 3.57 | 0.35 | 61.24  | 0.0000 | 0.0000 | MORE  |
| 1964 | 1972 | c4 | 5514  | 72  | 241 | 16 | 3.15  | 1.31 | 4.37 | 0.29 | 51.38  | 0.0000 | 0.0000 | MORE  |
| 2834 | 2838 | a1 | 7641  | 80  | 25  | 0  | 0.26  | 1.05 | 0.33 | 0.00 | 0.22   | 0.6391 | 0.7564 | FEWER |
| 2834 | 2838 | a2 | 10596 | 66  | 33  | 0  | 0.21  | 0.62 | 0.31 | 0.00 | 0.43   | 0.5141 | 0.6480 | FEWER |
| 2834 | 2838 | a3 | 11701 | 45  | 43  | 0  | 0.17  | 0.38 | 0.37 | 0.00 | 0.68   | 0.4088 | 0.5581 | FEWER |
| 2834 | 2838 | a4 | 9330  | 128 | 24  | 0  | 0.33  | 1.37 | 0.26 | 0.00 | 0.09   | 0.7642 | 0.8408 | FEWER |
| 2834 | 2838 | b1 | 8710  | 474 | 64  | 0  | 3.48  | 5.44 | 0.73 | 0.00 | 2.72   | 0.0990 | 0.1780 | FEWER |
| 2834 | 2838 | b3 | 9027  | 470 | 102 | 0  | 5.31  | 5.21 | 1.13 | 0.00 | 4.65   | 0.0311 | 0.0659 | FEWER |
| 2834 | 2838 | b4 | 8770  | 281 | 108 | 0  | 3.46  | 3.20 | 1.23 | 0.00 | 2.65   | 0.1036 | 0.1843 | FEWER |
| 2834 | 2838 | c1 | 7955  | 476 | 51  | 1  | 3.05  | 5.98 | 0.64 | 0.01 | 0.84   | 0.3581 | 0.5100 | FEWER |
| 2834 | 2838 | c3 | 9033  | 247 | 80  | 0  | 2.19  | 2.73 | 0.89 | 0.00 | 1.35   | 0.2452 | 0.3752 | FEWER |
| 2834 | 2838 | c4 | 11106 | 263 | 134 | 2  | 3.17  | 2.37 | 1.21 | 0.02 | 0.15   | 0.7004 | 0.8029 | FEWER |
| 2834 | 2845 | a1 | 5654  | 29  | 72  | 0  | 0.37  | 0.51 | 1.27 | 0.00 | 0.05   | 0.8282 | 0.8908 | FEWER |
| 2834 | 2845 | a2 | 7795  | 29  | 166 | 0  | 0.62  | 0.37 | 2.13 | 0.00 | 0.02   | 0.8796 | 0.9187 | FEWER |
| 2834 | 2845 | a3 | 8695  | 19  | 137 | 1  | 0.30  | 0.22 | 1.58 | 0.01 | 0.14   | 0.7114 | 0.8043 | MORE  |
| 2834 | 2845 | a4 | 6993  | 33  | 98  | 1  | 0.46  | 0.47 | 1.40 | 0.01 | 0.00   | 0.9556 | 0.9703 | MORE  |
| 2834 | 2845 | b1 | 6571  | 107 | 192 | 16 | 3.13  | 1.63 | 2.92 | 0.24 | 51.28  | 0.0000 | 0.0000 | MORE  |
| 2834 | 2845 | b3 | 6628  | 124 | 267 | 27 | 5.00  | 1.87 | 4.03 | 0.41 | 98.31  | 0.0000 | 0.0000 | MORE  |
| 2834 | 2845 | b4 | 6525  | 77  | 170 | 1  | 2.01  | 1.18 | 2.61 | 0.02 | 0.13   | 0.7157 | 0.8053 | FEWER |
| 2834 | 2845 | c1 | 5879  | 113 | 136 | 7  | 2.61  | 1.92 | 2.31 | 0.12 | 6.03   | 0.0141 | 0.0313 | MORE  |
| 2834 | 2845 | c3 | 6847  | 74  | 195 | 3  | 2.11  | 1.08 | 2.85 | 0.04 | 0.08   | 0.7827 | 0.8527 | MORE  |
| 2834 | 2845 | c4 | 8360  | 65  | 289 | 2  | 2.25  | 0.78 | 3.46 | 0.02 | 0.03   | 0.8631 | 0.9171 | FEWER |
| 2834 | 2858 | a1 | 2622  | 5   | 74  | 0  | 0.14  | 0.19 | 2.82 | 0.00 | 0.94   | 0.3320 | 0.4855 | FEWER |
| 2834 | 2858 | a2 | 3357  | 6   | 42  | 0  | 0.08  | 0.18 | 1.25 | 0.00 | 2.44   | 0.1183 | 0.2037 | FEWER |
| 2834 | 2858 | a3 | 3734  | 2   | 31  | 0  | 0.02  | 0.05 | 0.83 | 0.00 | 14.20  | 0.0002 | 0.0005 | FEWER |
| 2834 | 2858 | a4 | 3317  | 4   | 132 | 0  | 0.16  | 0.12 | 3.98 | 0.00 | 0.76   | 0.3831 | 0.5363 | FEWER |
| 2834 | 2858 | b1 | 3213  | 14  | 206 | 0  | 0.90  | 0.44 | 6.41 | 0.00 | 0.19   | 0.6637 | 0.7744 | FEWER |
| 2834 | 2858 | b3 | 3060  | 9   | 177 | 0  | 0.52  | 0.29 | 5.78 | 0.00 | 0.00   | 0.9765 | 0.9825 | FEWER |
| 2834 | 2858 | b4 | 3073  | 7   | 100 | 0  | 0.23  | 0.23 | 3.25 | 0.00 | 0.34   | 0.5616 | 0.6868 | FEWER |
| 2834 | 2858 | c1 | 2770  | 15  | 207 | 1  | 1.12  | 0.54 | 7.47 | 0.04 | 0.14   | 0.7090 | 0.8043 | FEWER |
| 2834 | 2858 | c3 | 3236  | 8   | 146 | 0  | 0.36  | 0.25 | 4.51 | 0.00 | 0.06   | 0.8125 | 0.8793 | FEWER |
| 2834 | 2858 | c4 | 3897  | 12  | 181 | 0  | 0.56  | 0.31 | 4.64 | 0.00 | 0.01   | 0.9372 | 0.9576 | FEWER |
| 2838 | 2845 | a1 | 6738  | 273 | 112 | 8  | 4.54  | 4.05 | 1.66 | 0.12 | 2.05   | 0.1523 | 0.2505 | MORE  |
| 2838 | 2845 | a2 | 9172  | 350 | 219 | 13 | 8.36  | 3.82 | 2.39 | 0.14 | 2.19   | 0.1391 | 0.2331 | MORE  |
| 2838 | 2845 | a3 | 10264 | 68  | 205 | 1  | 1.36  | 0.66 | 2.00 | 0.01 | 0.02   | 0.9018 | 0.9323 | FEWER |
| 2838 | 2845 | a4 | 8382  | 42  | 142 | 3  | 0.71  | 0.50 | 1.69 | 0.04 | 4.60   | 0.0320 | 0.0674 | MORE  |
| 2838 | 2845 | b1 | 7791  | 353 | 256 | 32 | 11.60 | 4.53 | 3.29 | 0.41 | 36.98  | 0.0000 | 0.0000 | MORE  |
| 2838 | 2845 | b3 | 7956  | 396 | 349 | 30 | 17.37 | 4.98 | 4.39 | 0.38 | 9.32   | 0.0023 | 0.0055 | MORE  |
| 2838 | 2845 | b4 | 7731  | 189 | 255 | 8  | 6.23  | 2.44 | 3.30 | 0.10 | 0.27   | 0.6016 | 0.7277 | MORE  |
| 2838 | 2845 | c1 | 6971  | 109 | 201 | 5  | 3.14  | 1.56 | 2.88 | 0.07 | 0.61   | 0.4337 | 0.5791 | MORE  |
| 2838 | 2845 | c3 | 8095  | 113 | 305 | 4  | 4.26  | 1.40 | 3.77 | 0.05 | 0.01   | 0.9040 | 0.9323 | FEWER |
| 2838 | 2845 | c4 | 9938  | 192 | 410 | 17 | 7.92  | 1.93 | 4.13 | 0.17 | 9.88   | 0.0017 | 0.0042 | MORE  |
| 2838 | 2858 | a1 | 3706  | 267 | 82  | 2  | 5.91  | 7.20 | 2.21 | 0.05 | 2.17   | 0.1411 | 0.2344 | FEWER |
| 2838 | 2858 | a2 | 4734  | 345 | 54  | 0  | 3.94  | 7.29 | 1.14 | 0.00 | 3.27   | 0.0705 | 0.1324 | FEWER |
| 2838 | 2858 | a3 | 5303  | 55  | 38  | 0  | 0.39  | 1.04 | 0.72 | 0.00 | 0.03   | 0.8649 | 0.9171 | FEWER |
| 2838 | 2858 | a4 | 4706  | 39  | 152 | 0  | 1.26  | 0.83 | 3.23 | 0.00 | 0.48   | 0.4896 | 0.6268 | FEWER |
| 2838 | 2858 | b1 | 4433  | 350 | 227 | 0  | 17.92 | 7.90 | 5.12 | 0.00 | 19.38  | 0.0000 | 0.0000 | FEWER |

|      |      |    |       |      |      |    |       |       |       |      |       |        |        |       |
|------|------|----|-------|------|------|----|-------|-------|-------|------|-------|--------|--------|-------|
| 2838 | 2858 | b3 | 4388  | 393  | 214  | 0  | 19.17 | 8.96  | 4.88  | 0.00 | 20.99 | 0.0000 | 0.0000 | FEWER |
| 2838 | 2858 | b4 | 4279  | 184  | 111  | 0  | 4.77  | 4.30  | 2.59  | 0.00 | 4.10  | 0.0428 | 0.0874 | FEWER |
| 2838 | 2858 | c1 | 3862  | 106  | 233  | 0  | 6.40  | 2.74  | 6.03  | 0.00 | 5.95  | 0.0147 | 0.0326 | FEWER |
| 2838 | 2858 | c3 | 4484  | 104  | 161  | 0  | 3.73  | 2.32  | 3.59  | 0.00 | 2.97  | 0.0846 | 0.1563 | FEWER |
| 2838 | 2858 | c4 | 5475  | 185  | 204  | 0  | 6.89  | 3.38  | 3.73  | 0.00 | 6.37  | 0.0116 | 0.0261 | FEWER |
| 2845 | 2858 | a1 | 5309  | 169  | 94   | 0  | 2.99  | 3.18  | 1.77  | 0.00 | 2.18  | 0.1396 | 0.2331 | FEWER |
| 2845 | 2858 | a2 | 6760  | 300  | 68   | 0  | 3.02  | 4.44  | 1.01  | 0.00 | 2.22  | 0.1362 | 0.2306 | FEWER |
| 2845 | 2858 | a3 | 7276  | 295  | 40   | 1  | 1.62  | 4.05  | 0.55  | 0.01 | 0.01  | 0.9220 | 0.9475 | FEWER |
| 2845 | 2858 | a4 | 6871  | 249  | 161  | 2  | 5.83  | 3.62  | 2.34  | 0.03 | 2.02  | 0.1547 | 0.2520 | FEWER |
| 2845 | 2858 | b1 | 6420  | 318  | 242  | 0  | 11.99 | 4.95  | 3.77  | 0.00 | 12.04 | 0.0005 | 0.0014 | FEWER |
| 2845 | 2858 | b3 | 6369  | 417  | 232  | 1  | 15.19 | 6.55  | 3.64  | 0.02 | 13.70 | 0.0002 | 0.0006 | FEWER |
| 2845 | 2858 | b4 | 6089  | 410  | 122  | 2  | 8.21  | 6.73  | 2.00  | 0.03 | 4.35  | 0.0370 | 0.0766 | FEWER |
| 2845 | 2858 | c1 | 5559  | 291  | 238  | 1  | 12.46 | 5.23  | 4.28  | 0.02 | 10.63 | 0.0011 | 0.0028 | FEWER |
| 2845 | 2858 | c3 | 6428  | 624  | 182  | 2  | 17.67 | 9.71  | 2.83  | 0.03 | 14.84 | 0.0001 | 0.0003 | FEWER |
| 2845 | 2858 | c4 | 7774  | 594  | 214  | 0  | 16.35 | 7.64  | 2.75  | 0.00 | 17.11 | 0.0000 | 0.0001 | FEWER |
| 3900 | 3905 | a1 | 3302  | 65   | 334  | 5  | 6.57  | 1.97  | 10.12 | 0.15 | 0.20  | 0.6552 | 0.7699 | FEWER |
| 3900 | 3905 | a2 | 2323  | 47   | 251  | 3  | 5.08  | 2.02  | 10.80 | 0.13 | 0.56  | 0.4537 | 0.5947 | FEWER |
| 3900 | 3905 | a3 | 1080  | 16   | 77   | 2  | 1.14  | 1.48  | 7.13  | 0.19 | 0.12  | 0.7251 | 0.8114 | MORE  |
| 3900 | 3905 | a4 | 4082  | 64   | 284  | 8  | 4.45  | 1.57  | 6.96  | 0.20 | 2.28  | 0.1313 | 0.2238 | MORE  |
| 3900 | 3905 | b1 | 6265  | 84   | 1248 | 34 | 16.73 | 1.34  | 19.92 | 0.54 | 21.27 | 0.0000 | 0.0000 | MORE  |
| 3900 | 3905 | b3 | 5385  | 106  | 1133 | 40 | 22.30 | 1.97  | 21.04 | 0.74 | 17.13 | 0.0000 | 0.0001 | MORE  |
| 3900 | 3905 | b4 | 3813  | 53   | 840  | 18 | 11.68 | 1.39  | 22.03 | 0.47 | 3.78  | 0.0519 | 0.1011 | MORE  |
| 3900 | 3905 | c1 | 5654  | 72   | 1032 | 23 | 13.14 | 1.27  | 18.25 | 0.41 | 8.26  | 0.0041 | 0.0096 | MORE  |
| 3900 | 3905 | c3 | 3136  | 42   | 549  | 21 | 7.35  | 1.34  | 17.51 | 0.67 | 28.88 | 0.0000 | 0.0000 | MORE  |
| 3900 | 3905 | c4 | 3461  | 47   | 556  | 19 | 7.55  | 1.36  | 16.06 | 0.55 | 19.18 | 0.0000 | 0.0000 | MORE  |
| 3900 | 3907 | a1 | 3026  | 46   | 27   | 1  | 0.41  | 1.52  | 0.89  | 0.03 | 0.02  | 0.8875 | 0.9240 | MORE  |
| 3900 | 3907 | a2 | 2123  | 42   | 15   | 0  | 0.30  | 1.98  | 0.71  | 0.00 | 0.14  | 0.7053 | 0.8043 | FEWER |
| 3900 | 3907 | a3 | 992   | 10   | 14   | 0  | 0.14  | 1.01  | 1.41  | 0.00 | 0.94  | 0.3336 | 0.4856 | FEWER |
| 3900 | 3907 | a4 | 3766  | 42   | 31   | 0  | 0.35  | 1.12  | 0.82  | 0.00 | 0.07  | 0.7910 | 0.8589 | FEWER |
| 3900 | 3907 | b1 | 5798  | 45   | 127  | 1  | 0.99  | 0.78  | 2.19  | 0.02 | 0.25  | 0.6195 | 0.7438 | MORE  |
| 3900 | 3907 | b3 | 4958  | 41   | 138  | 2  | 1.14  | 0.83  | 2.78  | 0.04 | 0.12  | 0.7323 | 0.8139 | MORE  |
| 3900 | 3907 | b4 | 3489  | 35   | 152  | 0  | 1.52  | 1.00  | 4.36  | 0.00 | 0.73  | 0.3937 | 0.5489 | FEWER |
| 3900 | 3907 | c1 | 5230  | 45   | 148  | 2  | 1.27  | 0.86  | 2.83  | 0.04 | 0.04  | 0.8379 | 0.8950 | MORE  |
| 3900 | 3907 | c3 | 2871  | 28   | 47   | 0  | 0.46  | 0.98  | 1.64  | 0.00 | 0.00  | 0.9503 | 0.9680 | FEWER |
| 3900 | 3907 | c4 | 3207  | 30   | 61   | 0  | 0.57  | 0.94  | 1.90  | 0.00 | 0.01  | 0.9244 | 0.9475 | FEWER |
| 3905 | 3907 | a1 | 3551  | 305  | 29   | 4  | 2.49  | 8.59  | 0.82  | 0.11 | 0.45  | 0.5019 | 0.6351 | MORE  |
| 3905 | 3907 | a2 | 2496  | 226  | 19   | 4  | 1.72  | 9.05  | 0.76  | 0.16 | 2.04  | 0.1532 | 0.2508 | MORE  |
| 3905 | 3907 | a3 | 1183  | 66   | 15   | 2  | 0.84  | 5.58  | 1.27  | 0.17 | 0.56  | 0.4528 | 0.5947 | MORE  |
| 3905 | 3907 | a4 | 4412  | 265  | 32   | 2  | 1.92  | 6.01  | 0.73  | 0.05 | 0.10  | 0.7527 | 0.8310 | MORE  |
| 3905 | 3907 | b1 | 6839  | 1149 | 149  | 47 | 25.03 | 16.80 | 2.18  | 0.69 | 22.62 | 0.0000 | 0.0000 | MORE  |
| 3905 | 3907 | b3 | 5717  | 1013 | 158  | 35 | 28.00 | 17.72 | 2.76  | 0.61 | 1.89  | 0.1694 | 0.2705 | MORE  |
| 3905 | 3907 | b4 | 4010  | 757  | 163  | 35 | 30.77 | 18.88 | 4.06  | 0.87 | 0.58  | 0.4460 | 0.5893 | MORE  |
| 3905 | 3907 | c1 | 6090  | 942  | 154  | 34 | 23.82 | 15.47 | 2.53  | 0.56 | 4.77  | 0.0289 | 0.0621 | MORE  |
| 3905 | 3907 | c3 | 3355  | 499  | 53   | 21 | 7.88  | 14.87 | 1.58  | 0.63 | 24.10 | 0.0000 | 0.0000 | MORE  |
| 3905 | 3907 | c4 | 3665  | 502  | 68   | 24 | 9.31  | 13.70 | 1.86  | 0.65 | 25.51 | 0.0000 | 0.0000 | MORE  |
| 4202 | 4203 | a1 | 9830  | 558  | 481  | 3  | 27.30 | 5.68  | 4.89  | 0.03 | 23.13 | 0.0000 | 0.0000 | FEWER |
| 4202 | 4203 | a2 | 12868 | 685  | 441  | 8  | 23.48 | 5.32  | 3.43  | 0.06 | 10.45 | 0.0012 | 0.0031 | FEWER |
| 4202 | 4203 | a3 | 13739 | 685  | 421  | 4  | 20.99 | 4.99  | 3.06  | 0.03 | 14.07 | 0.0002 | 0.0005 | FEWER |
| 4202 | 4203 | a4 | 11557 | 681  | 337  | 7  | 19.86 | 5.89  | 2.92  | 0.06 | 8.42  | 0.0037 | 0.0089 | FEWER |

|      |      |    |       |     |      |     |       |      |      |      |        |        |        |       |
|------|------|----|-------|-----|------|-----|-------|------|------|------|--------|--------|--------|-------|
| 4202 | 4203 | b1 | 10411 | 485 | 959  | 9   | 44.68 | 4.66 | 9.21 | 0.09 | 32.00  | 0.0000 | 0.0000 | FEWER |
| 4202 | 4203 | b3 | 12041 | 649 | 904  | 17  | 48.72 | 5.39 | 7.51 | 0.14 | 22.87  | 0.0000 | 0.0000 | FEWER |
| 4202 | 4203 | b4 | 11981 | 427 | 857  | 9   | 30.54 | 3.56 | 7.15 | 0.08 | 16.19  | 0.0001 | 0.0002 | FEWER |
| 4202 | 4203 | c1 | 9347  | 274 | 507  | 7   | 14.86 | 2.93 | 5.42 | 0.07 | 3.97   | 0.0462 | 0.0933 | FEWER |
| 4202 | 4203 | c3 | 12152 | 334 | 677  | 10  | 18.61 | 2.75 | 5.57 | 0.08 | 3.85   | 0.0498 | 0.0976 | FEWER |
| 4202 | 4203 | c4 | 14318 | 356 | 1300 | 13  | 32.32 | 2.49 | 9.08 | 0.09 | 12.36  | 0.0004 | 0.0012 | FEWER |
| 4202 | 4204 | a1 | 9364  | 557 | 244  | 46  | 14.51 | 5.95 | 2.61 | 0.49 | 72.22  | 0.0000 | 0.0000 | MORE  |
| 4202 | 4204 | a2 | 12244 | 685 | 339  | 67  | 18.97 | 5.59 | 2.77 | 0.55 | 129.79 | 0.0000 | 0.0000 | MORE  |
| 4202 | 4204 | a3 | 12988 | 684 | 323  | 80  | 17.01 | 5.27 | 2.49 | 0.62 | 248.50 | 0.0000 | 0.0000 | MORE  |
| 4202 | 4204 | a4 | 11055 | 681 | 273  | 58  | 16.82 | 6.16 | 2.47 | 0.52 | 107.53 | 0.0000 | 0.0000 | MORE  |
| 4202 | 4204 | b1 | 9838  | 484 | 416  | 59  | 20.47 | 4.92 | 4.23 | 0.60 | 77.62  | 0.0000 | 0.0000 | MORE  |
| 4202 | 4204 | b3 | 11329 | 649 | 473  | 88  | 27.10 | 5.73 | 4.18 | 0.78 | 149.06 | 0.0000 | 0.0000 | MORE  |
| 4202 | 4204 | b4 | 11352 | 427 | 414  | 54  | 15.57 | 3.76 | 3.65 | 0.48 | 99.62  | 0.0000 | 0.0000 | MORE  |
| 4202 | 4204 | c1 | 8944  | 274 | 328  | 40  | 10.05 | 3.06 | 3.67 | 0.45 | 92.44  | 0.0000 | 0.0000 | MORE  |
| 4202 | 4204 | c3 | 11589 | 334 | 438  | 41  | 12.62 | 2.88 | 3.78 | 0.35 | 65.88  | 0.0000 | 0.0000 | MORE  |
| 4202 | 4204 | c4 | 13655 | 356 | 367  | 39  | 9.57  | 2.61 | 2.69 | 0.29 | 92.31  | 0.0000 | 0.0000 | MORE  |
| 4203 | 4204 | a1 | 9644  | 443 | 264  | 10  | 12.13 | 4.59 | 2.74 | 0.10 | 0.24   | 0.6277 | 0.7482 | FEWER |
| 4203 | 4204 | a2 | 12642 | 405 | 385  | 14  | 12.33 | 3.20 | 3.05 | 0.11 | 0.12   | 0.7318 | 0.8139 | MORE  |
| 4203 | 4204 | a3 | 13335 | 416 | 345  | 13  | 10.76 | 3.12 | 2.59 | 0.10 | 0.30   | 0.5857 | 0.7110 | MORE  |
| 4203 | 4204 | a4 | 11356 | 330 | 289  | 6   | 8.40  | 2.91 | 2.54 | 0.05 | 0.45   | 0.5007 | 0.6351 | FEWER |
| 4203 | 4204 | b1 | 10164 | 844 | 441  | 27  | 36.62 | 8.30 | 4.34 | 0.27 | 2.59   | 0.1076 | 0.1903 | FEWER |
| 4203 | 4204 | b3 | 11640 | 803 | 511  | 30  | 35.25 | 6.90 | 4.39 | 0.26 | 0.72   | 0.3963 | 0.5501 | FEWER |
| 4203 | 4204 | b4 | 11669 | 874 | 438  | 29  | 32.81 | 7.49 | 3.75 | 0.25 | 0.37   | 0.5407 | 0.6664 | FEWER |
| 4203 | 4204 | c1 | 9154  | 496 | 339  | 15  | 18.37 | 5.42 | 3.70 | 0.16 | 0.49   | 0.4831 | 0.6247 | FEWER |
| 4203 | 4204 | c3 | 11959 | 679 | 456  | 23  | 25.89 | 5.68 | 3.81 | 0.19 | 0.24   | 0.6219 | 0.7440 | FEWER |
| 4203 | 4204 | c4 | 14060 | 918 | 403  | 19  | 26.31 | 6.53 | 2.87 | 0.14 | 1.94   | 0.1634 | 0.2622 | FEWER |
| 4319 | 4321 | a1 | 6593  | 182 | 344  | 61  | 9.50  | 2.76 | 5.22 | 0.93 | 297.23 | 0.0000 | 0.0000 | MORE  |
| 4319 | 4321 | a2 | 6881  | 187 | 310  | 62  | 8.42  | 2.72 | 4.51 | 0.90 | 359.93 | 0.0000 | 0.0000 | MORE  |
| 4319 | 4321 | a3 | 5679  | 101 | 192  | 25  | 3.41  | 1.78 | 3.38 | 0.44 | 137.20 | 0.0000 | 0.0000 | MORE  |
| 4319 | 4321 | a4 | 8552  | 167 | 341  | 48  | 6.66  | 1.95 | 3.99 | 0.56 | 266.09 | 0.0000 | 0.0000 | MORE  |
| 4319 | 4321 | b1 | 7340  | 327 | 346  | 104 | 15.41 | 4.46 | 4.71 | 1.42 | 552.90 | 0.0000 | 0.0000 | MORE  |
| 4319 | 4321 | b3 | 8269  | 424 | 381  | 125 | 19.54 | 5.13 | 4.61 | 1.51 | 623.14 | 0.0000 | 0.0000 | MORE  |
| 4319 | 4321 | b4 | 6999  | 307 | 290  | 73  | 12.72 | 4.39 | 4.14 | 1.04 | 306.52 | 0.0000 | 0.0000 | MORE  |
| 4319 | 4321 | c1 | 7260  | 285 | 276  | 75  | 10.83 | 3.93 | 3.80 | 1.03 | 404.77 | 0.0000 | 0.0000 | MORE  |
| 4319 | 4321 | c3 | 6923  | 207 | 224  | 41  | 6.70  | 2.99 | 3.24 | 0.59 | 181.73 | 0.0000 | 0.0000 | MORE  |
| 4319 | 4321 | c4 | 8329  | 225 | 280  | 51  | 7.56  | 2.70 | 3.36 | 0.61 | 259.20 | 0.0000 | 0.0000 | MORE  |
| 4493 | 4495 | a1 | 4471  | 36  | 42   | 6   | 0.34  | 0.81 | 0.94 | 0.13 | 80.18  | 0.0000 | 0.0000 | MORE  |
| 4493 | 4495 | a2 | 3543  | 25  | 29   | 4   | 0.20  | 0.71 | 0.82 | 0.11 | 53.89  | 0.0000 | 0.0000 | MORE  |
| 4493 | 4495 | a3 | 1922  | 9   | 12   | 0   | 0.06  | 0.47 | 0.62 | 0.00 | 3.54   | 0.0598 | 0.1137 | FEWER |
| 4493 | 4495 | a4 | 5237  | 24  | 30   | 1   | 0.14  | 0.46 | 0.57 | 0.02 | 0.97   | 0.3257 | 0.4784 | MORE  |
| 4493 | 4495 | b1 | 7835  | 206 | 303  | 49  | 7.97  | 2.63 | 3.87 | 0.63 | 220.32 | 0.0000 | 0.0000 | MORE  |
| 4493 | 4495 | b3 | 7232  | 216 | 274  | 62  | 8.18  | 2.99 | 3.79 | 0.86 | 372.15 | 0.0000 | 0.0000 | MORE  |
| 4493 | 4495 | b4 | 5232  | 117 | 196  | 44  | 4.38  | 2.24 | 3.75 | 0.84 | 370.99 | 0.0000 | 0.0000 | MORE  |
| 4493 | 4495 | c1 | 6329  | 110 | 198  | 31  | 3.44  | 1.74 | 3.13 | 0.49 | 223.52 | 0.0000 | 0.0000 | MORE  |
| 4493 | 4495 | c3 | 4421  | 60  | 104  | 12  | 1.41  | 1.36 | 2.35 | 0.27 | 74.86  | 0.0000 | 0.0000 | MORE  |
| 4493 | 4495 | c4 | 4655  | 52  | 94   | 15  | 1.05  | 1.12 | 2.02 | 0.32 | 177.81 | 0.0000 | 0.0000 | MORE  |
| 4999 | 5001 | a1 | 6319  | 420 | 303  | 53  | 20.14 | 6.65 | 4.80 | 0.84 | 58.51  | 0.0000 | 0.0000 | MORE  |
| 4999 | 5001 | a2 | 7837  | 529 | 415  | 74  | 28.01 | 6.75 | 5.30 | 0.94 | 83.64  | 0.0000 | 0.0000 | MORE  |
| 4999 | 5001 | a3 | 8046  | 551 | 431  | 101 | 29.52 | 6.85 | 5.36 | 1.26 | 193.64 | 0.0000 | 0.0000 | MORE  |

|      |      |    |      |     |     |    |       |      |       |      |        |        |        |       |
|------|------|----|------|-----|-----|----|-------|------|-------|------|--------|--------|--------|-------|
| 4999 | 5001 | a4 | 8415 | 474 | 395 | 80 | 22.25 | 5.63 | 4.69  | 0.95 | 163.79 | 0.0000 | 0.0000 | MORE  |
| 4999 | 5001 | b1 | 6497 | 272 | 426 | 69 | 17.83 | 4.19 | 6.56  | 1.06 | 160.76 | 0.0000 | 0.0000 | MORE  |
| 4999 | 5001 | b3 | 6490 | 251 | 462 | 50 | 17.87 | 3.87 | 7.12  | 0.77 | 62.72  | 0.0000 | 0.0000 | MORE  |
| 4999 | 5001 | b4 | 6403 | 262 | 422 | 73 | 17.27 | 4.09 | 6.59  | 1.14 | 197.20 | 0.0000 | 0.0000 | MORE  |
| 4999 | 5001 | c1 | 6198 | 198 | 415 | 50 | 13.26 | 3.19 | 6.70  | 0.81 | 109.69 | 0.0000 | 0.0000 | MORE  |
| 4999 | 5001 | c3 | 7395 | 275 | 441 | 55 | 16.40 | 3.72 | 5.96  | 0.74 | 97.77  | 0.0000 | 0.0000 | MORE  |
| 4999 | 5001 | c4 | 9103 | 341 | 719 | 95 | 26.93 | 3.75 | 7.90  | 1.04 | 191.19 | 0.0000 | 0.0000 | MORE  |
| 4999 | 5014 | a1 | 3459 | 30  | 17  | 0  | 0.15  | 0.87 | 0.49  | 0.00 | 0.85   | 0.3553 | 0.5082 | FEWER |
| 4999 | 5014 | a2 | 4214 | 37  | 25  | 0  | 0.22  | 0.88 | 0.59  | 0.00 | 0.36   | 0.5464 | 0.6708 | FEWER |
| 4999 | 5014 | a3 | 4312 | 38  | 26  | 0  | 0.23  | 0.88 | 0.60  | 0.00 | 0.33   | 0.5686 | 0.6929 | FEWER |
| 4999 | 5014 | a4 | 4774 | 59  | 27  | 1  | 0.33  | 1.24 | 0.57  | 0.02 | 0.08   | 0.7714 | 0.8460 | MORE  |
| 4999 | 5014 | b1 | 3814 | 28  | 21  | 0  | 0.15  | 0.73 | 0.55  | 0.00 | 0.79   | 0.3754 | 0.5300 | FEWER |
| 4999 | 5014 | b3 | 3591 | 19  | 20  | 0  | 0.11  | 0.53 | 0.56  | 0.00 | 1.48   | 0.2231 | 0.3430 | FEWER |
| 4999 | 5014 | b4 | 3607 | 28  | 25  | 0  | 0.19  | 0.78 | 0.69  | 0.00 | 0.49   | 0.4842 | 0.6247 | FEWER |
| 4999 | 5014 | c1 | 3688 | 20  | 18  | 0  | 0.10  | 0.54 | 0.49  | 0.00 | 1.68   | 0.1955 | 0.3033 | FEWER |
| 4999 | 5014 | c3 | 4211 | 25  | 21  | 0  | 0.12  | 0.59 | 0.50  | 0.00 | 1.14   | 0.2852 | 0.4264 | FEWER |
| 4999 | 5014 | c4 | 5110 | 32  | 26  | 0  | 0.16  | 0.63 | 0.51  | 0.00 | 0.71   | 0.4007 | 0.5539 | FEWER |
| 5001 | 5014 | a1 | 3944 | 4   | 23  | 0  | 0.02  | 0.10 | 0.58  | 0.00 | 9.81   | 0.0017 | 0.0043 | FEWER |
| 5001 | 5014 | a2 | 4833 | 12  | 29  | 0  | 0.07  | 0.25 | 0.60  | 0.00 | 2.57   | 0.1092 | 0.1921 | FEWER |
| 5001 | 5014 | a3 | 4996 | 11  | 30  | 0  | 0.07  | 0.22 | 0.60  | 0.00 | 2.87   | 0.0900 | 0.1636 | FEWER |
| 5001 | 5014 | a4 | 5419 | 9   | 31  | 0  | 0.05  | 0.17 | 0.57  | 0.00 | 3.94   | 0.0473 | 0.0937 | FEWER |
| 5001 | 5014 | b1 | 4365 | 7   | 25  | 0  | 0.04  | 0.16 | 0.57  | 0.00 | 5.31   | 0.0211 | 0.0461 | FEWER |
| 5001 | 5014 | b3 | 4215 | 13  | 31  | 1  | 0.10  | 0.31 | 0.74  | 0.02 | 1.73   | 0.1886 | 0.2955 | MORE  |
| 5001 | 5014 | b4 | 4181 | 10  | 29  | 1  | 0.07  | 0.24 | 0.69  | 0.02 | 2.70   | 0.1004 | 0.1796 | MORE  |
| 5001 | 5014 | c1 | 4292 | 16  | 29  | 2  | 0.11  | 0.37 | 0.68  | 0.05 | 18.11  | 0.0000 | 0.0001 | MORE  |
| 5001 | 5014 | c3 | 4861 | 15  | 26  | 0  | 0.08  | 0.31 | 0.53  | 0.00 | 2.21   | 0.1367 | 0.2306 | FEWER |
| 5001 | 5014 | c4 | 5901 | 19  | 39  | 0  | 0.13  | 0.32 | 0.66  | 0.00 | 1.13   | 0.2883 | 0.4292 | FEWER |
| 5285 | 5309 | a1 | 1465 | 2   | 91  | 0  | 0.12  | 0.14 | 6.21  | 0.00 | 1.21   | 0.2706 | 0.4084 | FEWER |
| 5285 | 5309 | a2 | 1358 | 3   | 92  | 0  | 0.20  | 0.22 | 6.77  | 0.00 | 0.47   | 0.4949 | 0.6311 | FEWER |
| 5285 | 5309 | a3 | 866  | 0   | 48  | 0  | 0.00  | 0.00 | 5.54  | 0.00 | NA     | NA     | NA     | SAME  |
| 5285 | 5309 | a4 | 2052 | 1   | 128 | 0  | 0.06  | 0.05 | 6.24  | 0.00 | 3.28   | 0.0703 | 0.1324 | FEWER |
| 5285 | 5309 | b1 | 2071 | 5   | 389 | 0  | 0.94  | 0.24 | 18.78 | 0.00 | 0.25   | 0.6146 | 0.7407 | FEWER |
| 5285 | 5309 | b3 | 1412 | 7   | 274 | 1  | 1.36  | 0.50 | 19.41 | 0.07 | 0.02   | 0.8921 | 0.9258 | FEWER |
| 5285 | 5309 | b4 | 1356 | 5   | 256 | 2  | 0.94  | 0.37 | 18.88 | 0.15 | 0.41   | 0.5244 | 0.6585 | MORE  |
| 5285 | 5309 | c1 | 1665 | 1   | 261 | 1  | 0.16  | 0.06 | 15.68 | 0.06 | 0.89   | 0.3450 | 0.4981 | MORE  |
| 5285 | 5309 | c3 | 1331 | 2   | 186 | 1  | 0.28  | 0.15 | 13.97 | 0.08 | 0.20   | 0.6527 | 0.7696 | MORE  |
| 5285 | 5309 | c4 | 1555 | 4   | 340 | 3  | 0.87  | 0.26 | 21.86 | 0.19 | 3.88   | 0.0490 | 0.0965 | MORE  |

**Supplementary Table 1.** Linkage analysis of informative pairs of highly polymorphic sites.

**Site1\_id/Site2\_id:** position of first/second site; **Sample:** DNA sample; **Coverage:** number of reads overlapping with both sites; **Site1\_muts/Site2\_muts:** number of reads with mutations at first/second site; **Both\_muts:** number of reads with mutations at both sites; **Exp\_muts:** expected number of reads with mutations at both sites (given proportions of reads with mutations at each site and assumption of independence); **Site1\_perc/Site2\_perc/Both\_perc:** percentage of reads covering both sites showing mutations at first/second/both site(s); **chisquare:** Yates' continuity-corrected Chi-square values; **prob:** probability associated with each chi-squared value; **fdr:** probability adjusted for expected false discovery with multiple comparisons; **direction:** logical value indicating if the observed number of co-occurring mutations was more or less than the expected number. Red-colored rows show an FDR probability < 0.05.
