# Supplementary figures and images for: High-Resolution Mapping of Evolutionary Trajectories in a Phage
Source: PubMed Central journal article supplement — Genome Biol Evol. 2009 Aug 11;1:294–307. doi: 10.1093/gbe/evp029 (PMC2817424; doi:10.1093/gbe/evp029), 2009-08-11

# Coverage: All Samples

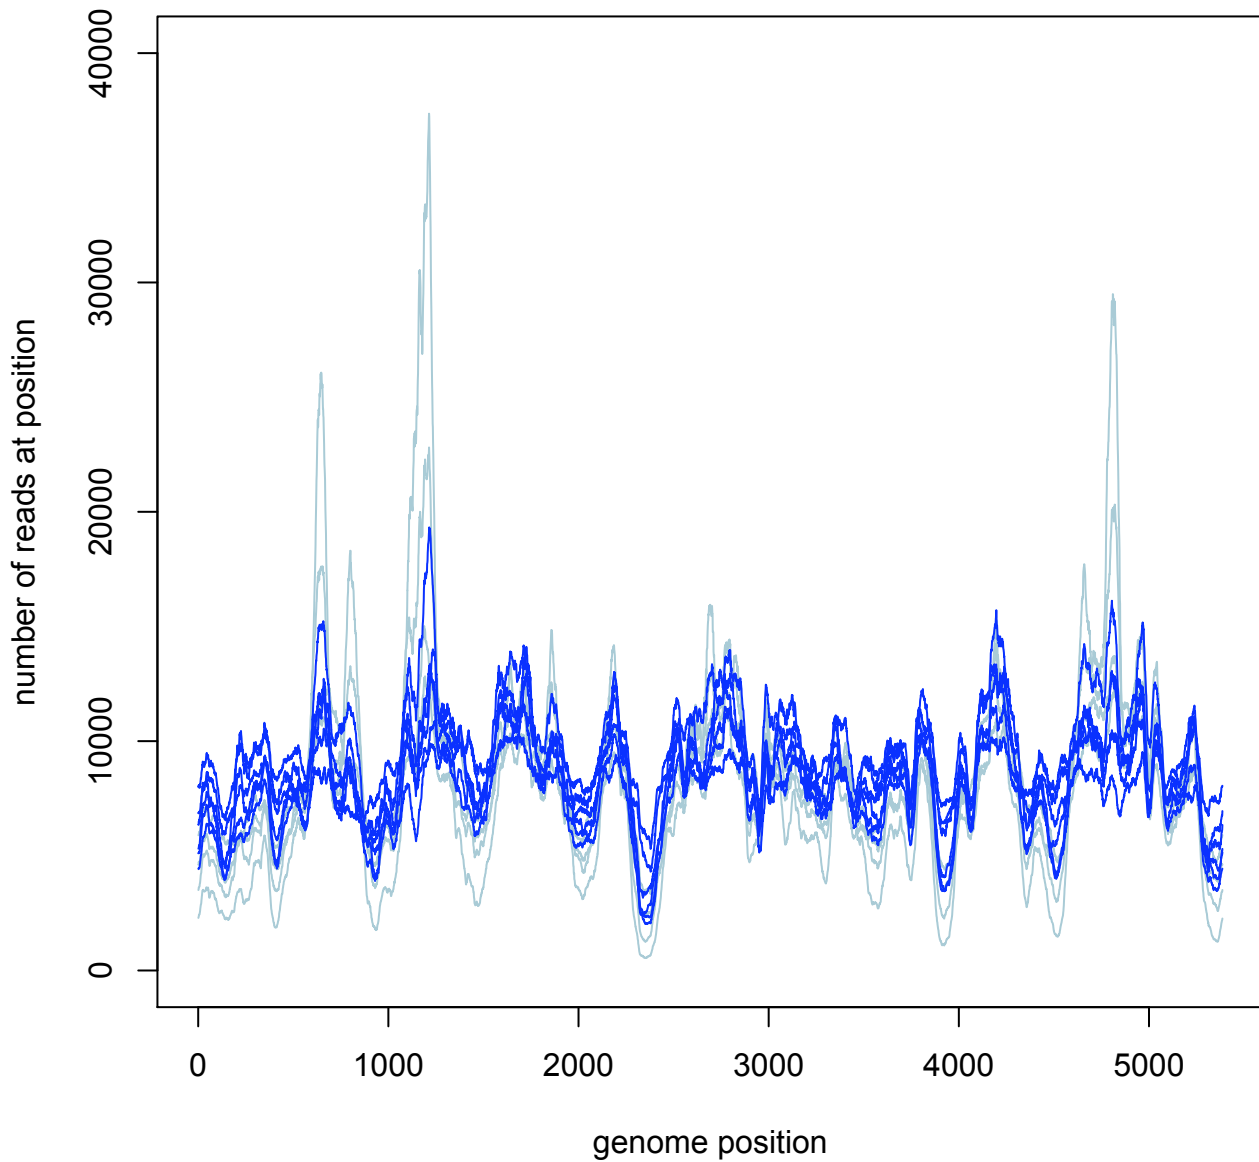

Supplement: evp029_1.pdf [file evp029_1.pdf]

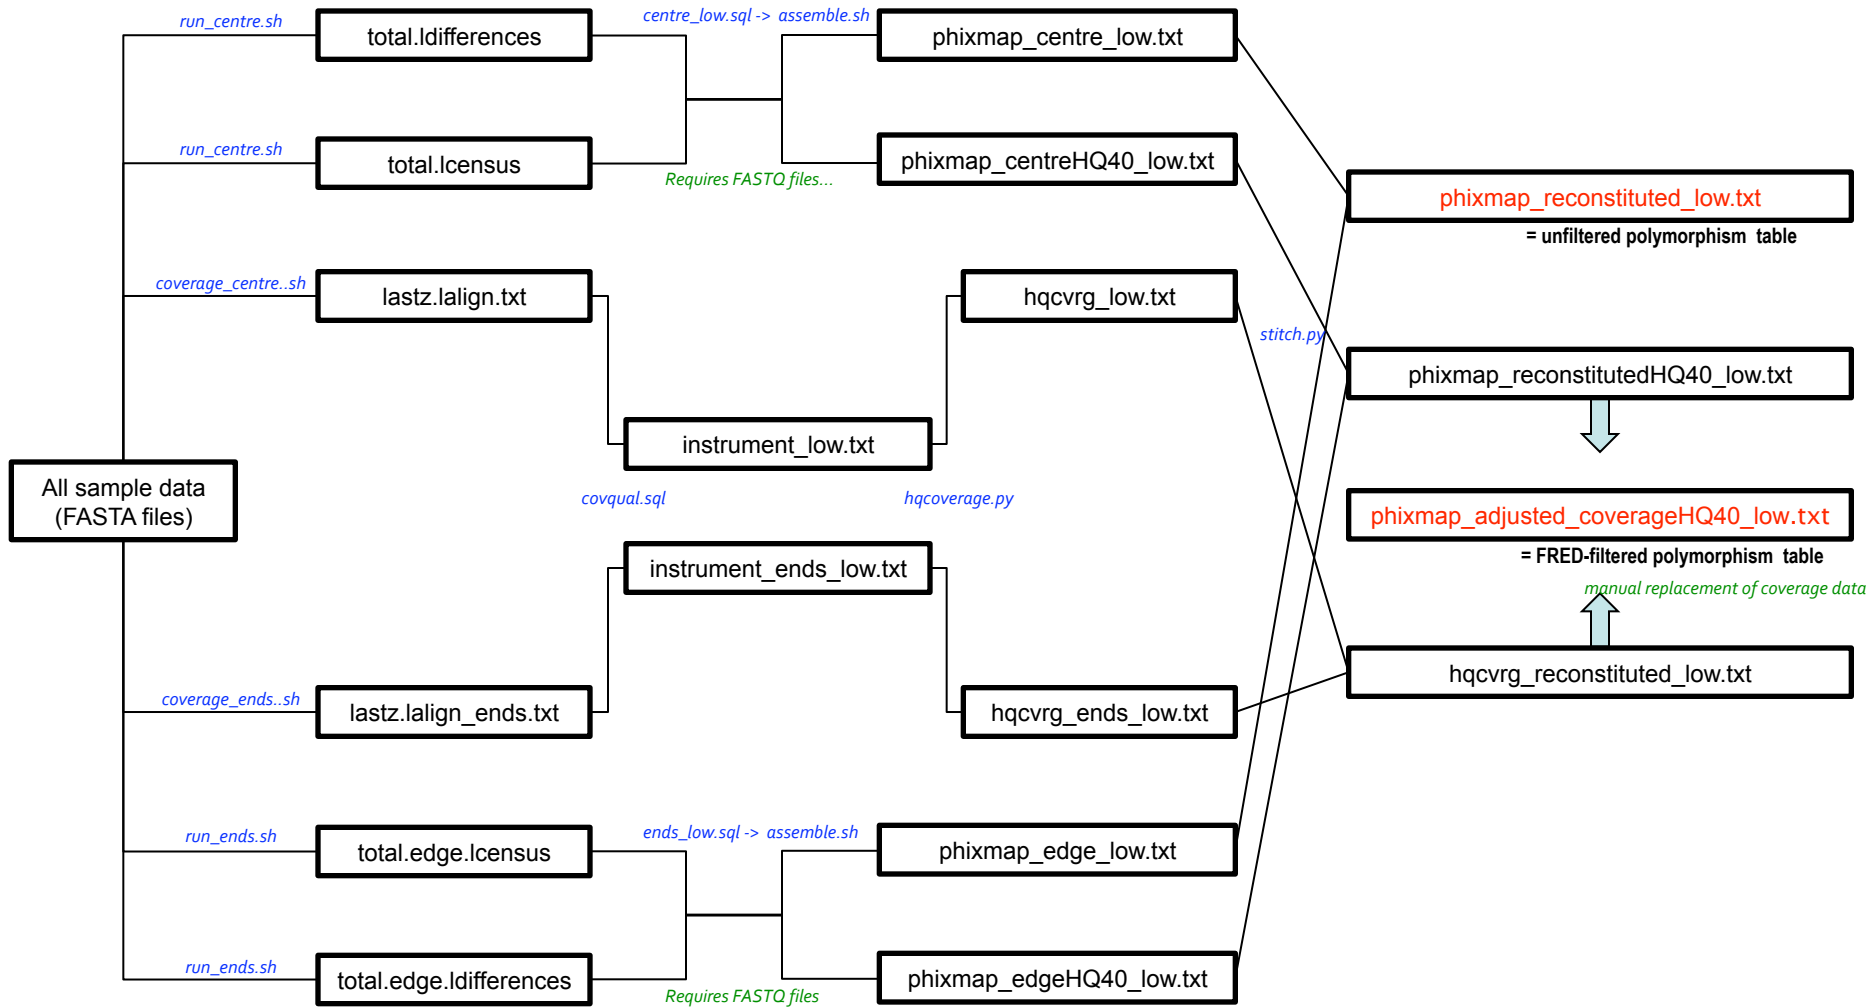

Supplement: evp029_2.pdf [file evp029_2.pdf]
